# Supplementary material for: EP4 and Class III β-Tubulin Expression in Uterine Smooth Muscle Tumors: Implications for Prognosis and Treatment
Source: PubMed Central journal article supplement (PMC6826612; doi:10.3390/cancers11101590), 2019-10-18

# Class III $\beta$ Tubulin Western Blots

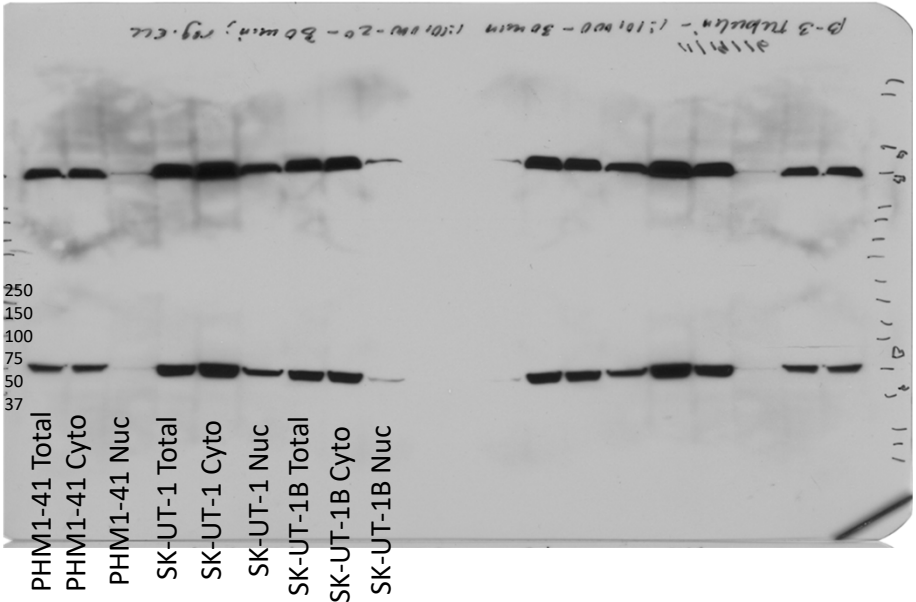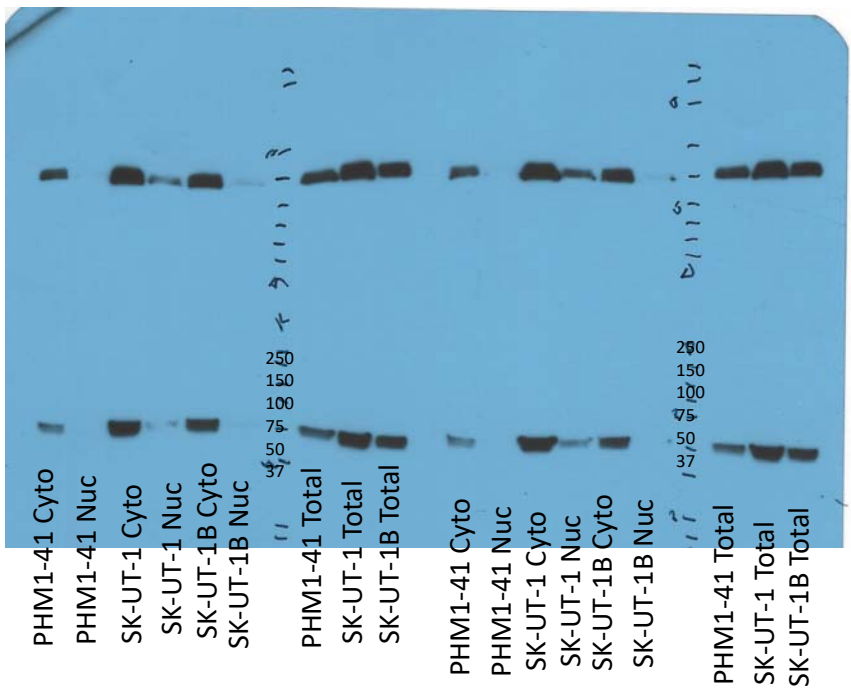

# EP4 Western Blots

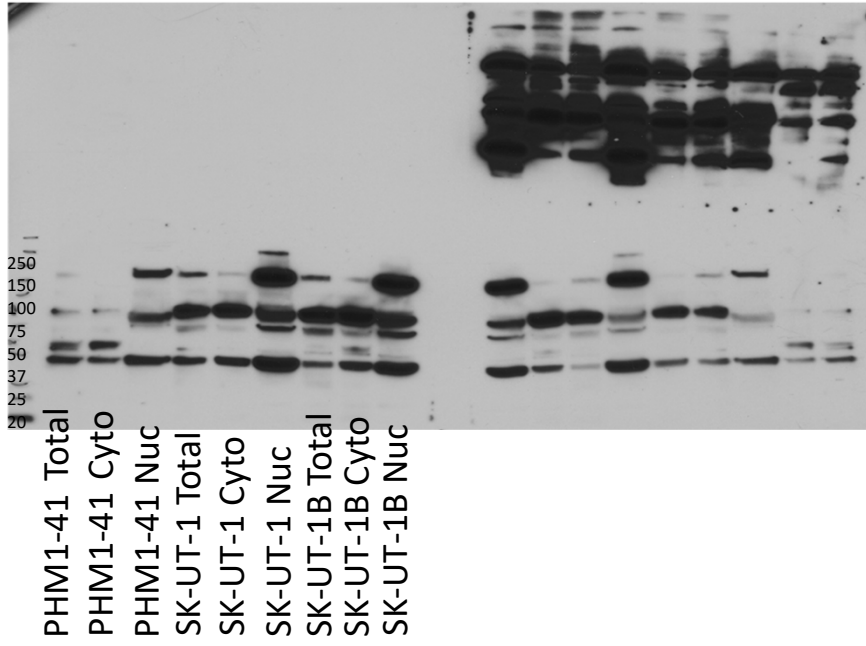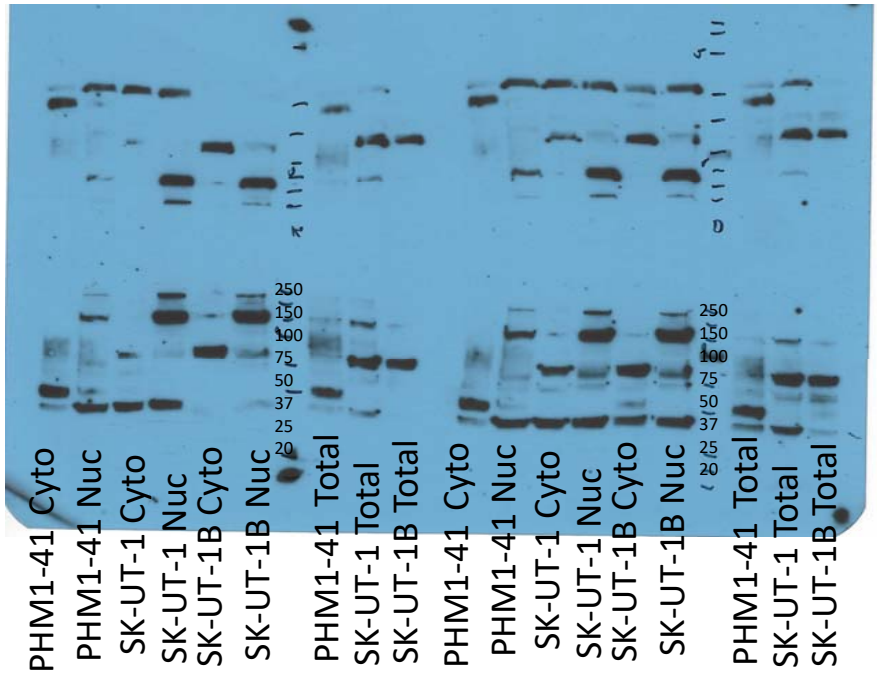

# Loading Controls

GAPDH

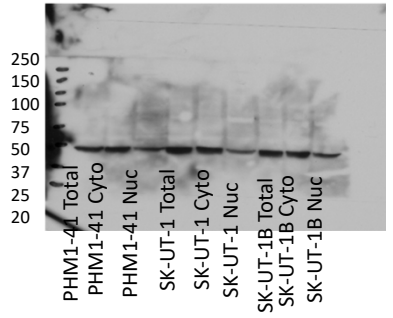

GAPDH

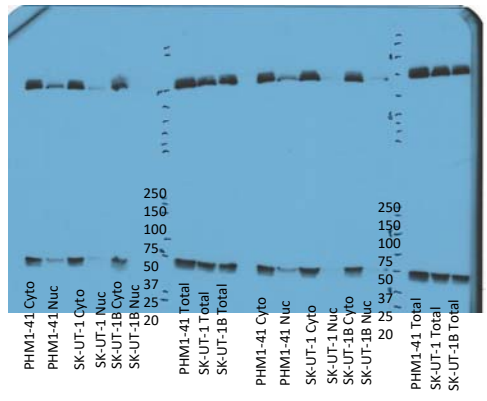

HDAC1

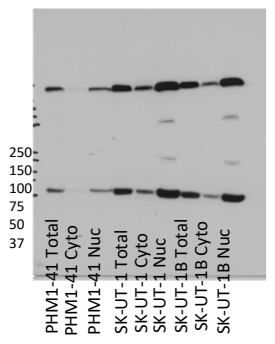

LDH

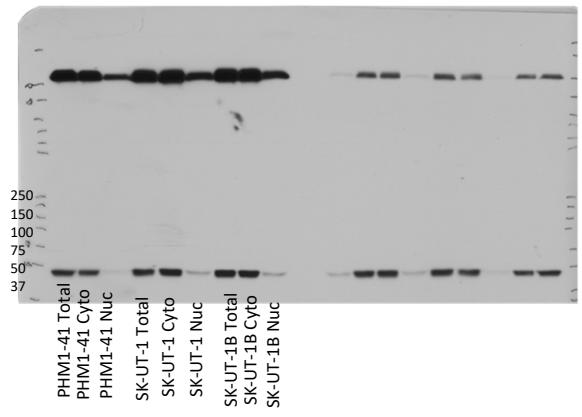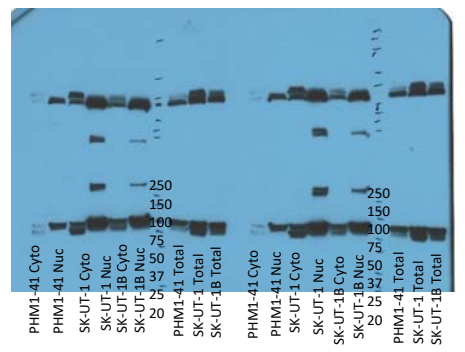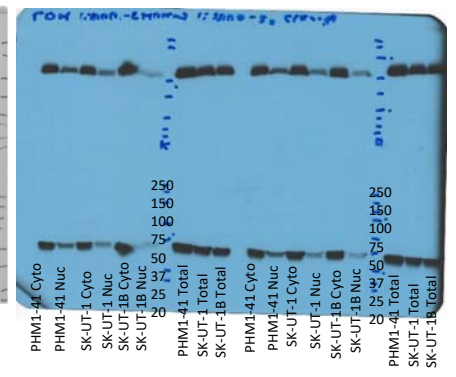

Supplement: cancers-11-01590-s001.pdf [file cancers-11-01590-s001.pdf]
